# Supplementary material for: Sodium Content and Labelling Completeness of Packaged Foods and Beverages in Kenya
Source: MDPI journal article supplement (doi:10.3390/nu13041385), 2021-04-20
Supplement: s1 [file s1]

**Table S1.** Comparison of sodium content of packaged foods and beverages in Kenya and South Africa by different food categories.

| Food category                   | Kenya                          |                                | South Africa                   |                                | Comparison<br>between median<br>sodium content<br>( <i>p</i> -value) |
|---------------------------------|--------------------------------|--------------------------------|--------------------------------|--------------------------------|----------------------------------------------------------------------|
|                                 | Total<br>number of<br>products | Median<br>sodium<br>(mg/100 g) | Total<br>number of<br>products | Median<br>sodium<br>(mg/100 g) |                                                                      |
| Herbs and spices                | 36                             | 9120                           | 107                            | 6798                           | 0.575                                                                |
| Sauces                          | 227                            | 1200                           | 797                            | 1079                           | 0.971                                                                |
| Meat alternatives               | 6                              | 766                            | 81                             | 917                            | 0.345                                                                |
| Noodles                         | 33                             | 760                            | 101                            | 1180                           | 0.005                                                                |
| Meal kits                       | 4                              | 739                            | 44                             | 922                            | 0.341                                                                |
| Cheeses                         | 40                             | 720                            | 443                            | 584                            | 0.045                                                                |
| Processed meats                 | 98                             | 600                            | 647                            | 760                            | <0.001                                                               |
| Ready meals                     | 9                              | 503                            | 314                            | 369                            | 0.025                                                                |
| Crisps and snacks               | 208                            | 480                            | 454                            | 680                            | <0.001                                                               |
| Spreads and dips                | 42                             | 438                            | 261                            | 311                            | 0.027                                                                |
| Processed fish                  | 27                             | 359                            | 359                            | 352                            | 0.523                                                                |
| Biscuits                        | 227                            | 259                            | 687                            | 358                            | <0.001                                                               |
| Nuts and seeds                  | 24                             | 240                            | 270                            | 22                             | 0.006                                                                |
| Soups                           | 36                             | 240                            | 314                            | 3015                           | <0.001                                                               |
| Cereal and nut-based bars       | 4                              | 212                            | 93                             | 148                            | 0.280                                                                |
| Breads                          | 50                             | 209                            | 274                            | 399                            | <0.001                                                               |
| Cakes, muffins and pastries     | 14                             | 200                            | 241                            | 335                            | 0.095                                                                |
| Edible oils                     | 23                             | 195                            | 167                            | 400                            | 0.013                                                                |
| Vegetables                      | 167                            | 172                            | 1144                           | 184                            | 0.481                                                                |
| Breakfast cereals               | 184                            | 112                            | 534                            | 171                            | <0.001                                                               |
| Baby foods                      | 15                             | 100                            | 258                            | 36                             | 0.041                                                                |
| Chocolates and sweets           | 99                             | 68                             | 674                            | 63                             | 0.555                                                                |
| Creams                          | 6                              | 68                             | 53                             | 33                             | 0.053                                                                |
| Energy drinks                   | 9                              | 68                             | 85                             | 35                             | 0.089                                                                |
| Ice creams and edible ices      | 92                             | 65                             | 137                            | 49                             | <0.001                                                               |
| Syrups                          | 2                              | 42                             | 50                             | 104                            | 0.634                                                                |
| Milks                           | 52                             | 39                             | 434                            | 48                             | <0.001                                                               |
| Coffees and teas                | 67                             | 20                             | 212                            | 140                            | <0.001                                                               |
| Other cereal and grain products | 11                             | 18                             | 269                            | 8                              | 0.282                                                                |
| Pasta                           | 16                             | 13                             | 224                            | 5                              | 0.678                                                                |
| Desserts                        | 4                              | 9                              | 102                            | 69                             | 0.108                                                                |
| Fruit and vegetable juices      | 128                            | 8                              | 851                            | 5                              | 0.064                                                                |
| Fruits                          | 49                             | 7                              | 596                            | 11                             | <0.001                                                               |
| Soft drinks                     | 73                             | 5                              | 471                            | 8                              | 0.037                                                                |
| Cous cous                       | 1                              | 4                              | 26                             | 10                             | 0.699                                                                |
| Waters                          | 3                              | 1                              | 161                            | 8                              | 0.179                                                                |

|                                 |    |   |     |     |        |
|---------------------------------|----|---|-----|-----|--------|
| Chewing gums                    | 13 | 0 | 46  | 1   | 0.308  |
| Coconut oils                    | 8  | 0 | 26  | 2   | 0.009  |
| Cooking oils                    | 71 | 0 | 189 | 0   | <0.001 |
| Cordials                        | 3  | 0 | 183 | 70  | 0.005  |
| Electrolyte/sports drinks       | 5  | 0 | 38  | 41  | 0.004  |
| Honeys                          | 28 | 0 | 27  | 5   | 0.004  |
| Jams and marmalades             | 46 | 0 | 119 | 12  | <0.001 |
| Jellies                         | 4  | 0 | 59  | 36  | 0.006  |
| Mayonnaises and salad dressings | 32 | 0 | 252 | 464 | <0.001 |
| Rices                           | 65 | 0 | 97  | 5   | <0.001 |

---
